# Supplementary material for: More electrons on Fe and FeN2 promote nitrogen fixation efficiency
Source: Royal Society of Chemistry journal article supplement (doi:10.1039/d4nj02701a), 2024-01-01
Supplement: d4nj02701a1.pdf [file d4nj02701a1.pdf]

## Supporting Information

### **More Electrons on Fe and FeN<sub>2</sub> Promote Nitrogen Fixation Efficiency**

Jin Feng<sup>1</sup>, Xinlu Wang<sup>1</sup>, Wenxing Xu<sup>1</sup>, Xiaorui Xu<sup>1</sup>, Dapeng Zhang<sup>1\*</sup>,

<sup>1</sup> Key Laboratory of Life-Organic Analysis of Shandong Province, School of Chemistry and Chemical Engineering, Qufu Normal University, P. R. China

\*Corresponding author.

E-mail: zdp1014636837@hotmail.com

| System                                   | $E_{bind}$ | $E_{coh}$ | $E_{clus}$ |
|------------------------------------------|------------|-----------|------------|
| Fe/g-C <sub>3</sub> N <sub>4</sub>       | -7.26      | -4.06     | -3.20      |
| Fe-Ce/g-C <sub>3</sub> N <sub>4</sub>    | -6.97      | -4.06     | -2.92      |
| Fe/Nv-g-C <sub>3</sub> N <sub>4</sub>    | -8.26      | -4.06     | -4.21      |
| Fe-Ce/Nv-g-C <sub>3</sub> N <sub>4</sub> | -8.00      | -4.06     | -3.94      |

**Table S1.** Cohesive energies ( $E_{coh}$ ), binding energies ( $E_{bind}$ ) and cluster energies ( $E_{clus}$ ) for Fe in Fe/g-C<sub>3</sub>N<sub>4</sub>, Fe-Ce/g-C<sub>3</sub>N<sub>4</sub>, Fe/Nv-g-C<sub>3</sub>N<sub>4</sub>, Fe-Ce/Nv-g-C<sub>3</sub>N<sub>4</sub>. All energies are in eV.

|   | Fe/g-C <sub>3</sub> N <sub>4</sub> |        |       | Fe/Nv-g-C <sub>3</sub> N <sub>4</sub> |        |       | Fe-Ce/g-C <sub>3</sub> N <sub>4</sub> |        |       | Fe-Ce/Nv-g-C <sub>3</sub> N <sub>4</sub> |        |       |
|---|------------------------------------|--------|-------|---------------------------------------|--------|-------|---------------------------------------|--------|-------|------------------------------------------|--------|-------|
|   | x                                  | y      | z     | x                                     | y      | z     | x                                     | y      | z     | x                                        | y      | z     |
| C | 3.602                              | 4.693  | 0.832 | 3.566                                 | 4.627  | 0.713 | 3.615                                 | 4.707  | 0.611 | 3.612                                    | 4.670  | 0.825 |
| C | 1.296                              | 0.695  | 0.554 | 1.172                                 | 0.594  | 0.714 | 1.244                                 | 0.674  | 0.706 | 1.191                                    | 0.599  | 1.328 |
| C | 5.849                              | 0.669  | 1.318 | 5.760                                 | 0.640  | 1.312 | 5.835                                 | 0.677  | 1.342 | 5.804                                    | 0.677  | 0.777 |
| C | 2.397                              | 2.728  | 0.474 | 2.297                                 | 2.645  | 0.501 | 2.449                                 | 2.656  | 0.335 | 2.382                                    | 2.639  | 1.034 |
| C | 3.535                              | 0.623  | 1.061 | 3.427                                 | 0.541  | 1.232 | 3.522                                 | 0.602  | 1.132 | 3.509                                    | 0.523  | 1.092 |
| C | 4.682                              | 2.720  | 1.230 | 4.619                                 | 2.611  | 1.063 | 4.723                                 | 2.711  | 0.933 | 4.613                                    | 2.618  | 0.402 |
| C | 0.015                              | 10.817 | 0.485 | 13.984                                | 10.516 | 0.613 | 14.229                                | 10.835 | 0.663 | 13.999                                   | 10.621 | 1.249 |
| C | 2.328                              | 6.887  | 0.854 | 2.397                                 | 6.840  | 0.920 | 2.350                                 | 6.886  | 0.660 | 2.406                                    | 6.858  | 0.791 |
| C | 0.079                              | 6.858  | 1.320 | 0.221                                 | 6.728  | 1.505 | 0.086                                 | 6.907  | 1.284 | 0.109                                    | 6.778  | 0.610 |
| C | 1.212                              | 8.849  | 0.409 | 1.152                                 | 8.737  | 0.529 | 1.215                                 | 8.902  | 0.483 | 1.179                                    | 8.838  | 1.044 |
| C | 4.886                              | 6.876  | 0.924 | 5.008                                 | 6.762  | 0.869 | 4.888                                 | 6.890  | 0.624 | 4.991                                    | 6.851  | 0.851 |
| C | 5.940                              | 8.865  | 1.349 | 6.045                                 | 8.857  | 1.030 | 5.925                                 | 8.898  | 0.986 | 6.062                                    | 8.920  | 0.639 |
| C | 10.727                             | 4.686  | 1.245 | 10.884                                | 4.822  | 1.223 | 10.668                                | 4.705  | 1.408 | 10.782                                   | 4.891  | 1.229 |
| C | 8.393                              | 0.664  | 1.157 | 8.313                                 | 0.884  | 1.133 | 8.358                                 | 0.664  | 1.271 | 8.309                                    | 0.922  | 0.692 |
| C | 12.970                             | 0.699  | 0.555 | 12.901                                | 0.674  | 0.684 | 12.960                                | 0.668  | 0.714 | 12.894                                   | 0.692  | 1.231 |
| C | 9.592                              | 2.697  | 1.342 | 9.571                                 | 2.890  | 1.344 | 9.547                                 | 2.687  | 1.578 | 9.491                                    | 2.949  | 0.987 |
| C | 10.670                             | 0.635  | 0.660 | 10.601                                | 0.756  | 0.727 | 10.647                                | 0.595  | 0.864 | 10.613                                   | 0.761  | 0.834 |
| C | 11.942                             | 2.727  | 0.928 | 11.943                                | 2.782  | 0.926 | 11.851                                | 2.672  | 1.181 | 11.783                                   | 2.763  | 1.558 |
| C | 7.142                              | 10.815 | 1.503 | 7.170                                 | 10.859 | 1.282 | 7.101                                 | 10.823 | 1.379 | 7.185                                    | 10.936 | 0.811 |
| C | 9.451                              | 6.883  | 1.235 | 9.677                                 | 7.019  | 1.192 | 9.412                                 | 6.886  | 1.287 | 9.604                                    | 7.080  | 1.365 |
| C | 7.192                              | 6.862  | 0.787 | 7.376                                 | 6.848  | 0.931 | 7.193                                 | 6.851  | 0.680 | 7.297                                    | 6.909  | 1.285 |
| C | 8.356                              | 8.872  | 1.569 | 8.477                                 | 8.975  | 1.414 | 8.289                                 | 8.867  | 1.574 | 8.453                                    | 9.059  | 1.203 |
| C | 12.018                             | 6.889  | 1.263 | 12.295                                | 7.102  | 1.359 | 11.966                                | 6.888  | 1.354 | 12.189                                   | 7.163  | 1.053 |
| C | 13.073                             | 8.883  | 0.864 | 12.978                                | 8.421  | 1.006 | 13.045                                | 8.926  | 1.122 | 12.925                                   | 8.500  | 1.164 |
| N | 0.011                              | 12.293 | 0.485 | 14.079                                | 12.202 | 0.668 | 14.222                                | 12.303 | 0.653 | 14.094                                   | 12.226 | 1.307 |
| N | 4.720                              | 4.052  | 1.291 | 4.703                                 | 3.941  | 1.017 | 4.712                                 | 4.034  | 1.026 | 4.701                                    | 3.960  | 0.433 |
| N | 1.324                              | 2.006  | 0.159 | 1.224                                 | 1.882  | 0.252 | 1.275                                 | 2.007  | 0.277 | 1.230                                    | 1.995  | 1.349 |
| N | 4.704                              | 0.008  | 1.200 | 4.621                                 | 12.280 | 1.452 | 4.661                                 | 0.049  | 1.506 | 4.727                                    | 0.024  | 1.249 |
| N | 5.872                              | 2.055  | 1.420 | 5.791                                 | 1.991  | 1.177 | 5.876                                 | 2.056  | 1.217 | 5.775                                    | 1.989  | 0.420 |
| N | 2.341                              | 0.004  | 1.002 | 2.239                                 | 12.258 | 1.223 | 2.308                                 | 0.047  | 1.212 | 2.365                                    | 12.292 | 1.437 |
| N | 2.511                              | 4.074  | 0.348 | 2.424                                 | 3.994  | 0.346 | 2.455                                 | 4.013  | 0.245 | 2.516                                    | 3.966  | 1.294 |
| N | 3.538                              | 2.034  | 0.969 | 3.447                                 | 1.946  | 0.978 | 3.614                                 | 1.949  | 0.551 | 3.403                                    | 1.899  | 0.399 |

|    |        |        |       |        |        |       |        |        |       |        |        |       |
|----|--------|--------|-------|--------|--------|-------|--------|--------|-------|--------|--------|-------|
| N  | 1.143  | 10.160 | 0.121 | 0.952  | 10.037 | 0.251 | 1.102  | 10.197 | 0.219 | 1.023  | 10.140 | 1.165 |
| N  | 1.285  | 6.263  | 1.432 | 1.478  | 6.172  | 1.590 | 1.242  | 6.206  | 1.174 | 1.296  | 6.100  | 0.479 |
| N  | 2.332  | 8.101  | 0.282 | 2.306  | 8.058  | 0.339 | 2.279  | 8.138  | 0.203 | 2.360  | 8.161  | 1.075 |
| N  | 0.049  | 8.190  | 0.869 | 0.080  | 8.020  | 1.049 | 0.085  | 8.257  | 1.158 | 0.014  | 8.081  | 0.892 |
| N  | 3.618  | 6.141  | 0.855 | 3.710  | 6.068  | 0.791 | 3.607  | 6.144  | 0.596 | 3.681  | 6.125  | 0.841 |
| N  | 4.810  | 8.134  | 1.368 | 4.943  | 8.098  | 0.946 | 4.794  | 8.189  | 0.906 | 4.968  | 8.138  | 0.497 |
| N  | 6.023  | 6.240  | 0.538 | 6.234  | 6.082  | 0.839 | 6.043  | 6.218  | 0.372 | 6.148  | 6.159  | 1.203 |
| N  | 5.961  | 10.186 | 1.472 | 6.043  | 10.199 | 0.980 | 5.957  | 10.226 | 1.019 | 6.084  | 10.240 | 0.415 |
| N  | 7.130  | 12.281 | 1.338 | 7.074  | 0.032  | 1.283 | 7.097  | 12.287 | 1.360 | 7.106  | 0.078  | 0.761 |
| N  | 11.872 | 4.072  | 0.928 | 11.972 | 4.139  | 0.879 | 11.833 | 4.017  | 1.099 | 11.868 | 4.121  | 1.642 |
| N  | 8.401  | 2.027  | 1.434 | 8.341  | 2.264  | 1.414 | 8.367  | 2.023  | 1.587 | 8.296  | 2.326  | 0.800 |
| N  | 11.828 | 0.043  | 0.324 | 11.702 | 0.055  | 0.491 | 11.798 | 0.047  | 0.483 | 11.784 | 0.126  | 0.757 |
| N  | 13.060 | 2.025  | 0.837 | 13.021 | 2.015  | 0.879 | 13.009 | 2.029  | 0.984 | 12.933 | 2.053  | 1.575 |
| N  | 9.475  | 0.026  | 0.707 | 9.367  | 0.204  | 0.729 | 9.443  | 0.036  | 0.802 | 9.459  | 0.263  | 0.462 |
| N  | 9.564  | 4.021  | 1.553 | 9.703  | 4.199  | 1.586 | 9.521  | 4.021  | 1.664 | 9.665  | 4.257  | 0.794 |
| N  | 10.721 | 2.014  | 1.021 | 10.688 | 2.140  | 1.012 | 10.713 | 1.945  | 1.441 | 10.577 | 2.116  | 1.441 |
| N  | 8.324  | 10.201 | 1.733 | 8.348  | 10.299 | 1.603 | 8.223  | 10.183 | 1.800 | 8.337  | 10.389 | 1.230 |
| N  | 8.390  | 6.248  | 0.681 | 8.572  | 6.293  | 0.832 | 8.394  | 6.237  | 0.674 | 8.465  | 6.340  | 1.553 |
| N  | 9.457  | 8.118  | 1.748 | 9.656  | 8.337  | 1.486 | 9.378  | 8.111  | 1.821 | 9.632  | 8.424  | 1.277 |
| N  | 7.169  | 8.201  | 1.181 | 7.295  | 8.220  | 1.145 | 7.150  | 8.203  | 1.047 | 7.259  | 8.287  | 1.059 |
| N  | 10.730 | 6.137  | 1.276 | 10.930 | 6.346  | 1.245 | 10.706 | 6.138  | 1.380 | 10.846 | 6.395  | 1.261 |
| N  | 11.935 | 8.172  | 0.899 | 13.267 | 6.211  | 1.727 | 11.923 | 8.204  | 1.171 | 13.145 | 6.213  | 0.676 |
| N  | 13.152 | 6.253  | 1.624 | 12.874 | 9.850  | 0.905 | 13.179 | 6.200  | 1.468 | 12.852 | 9.910  | 1.337 |
| N  | 13.107 | 10.216 | 0.823 | □-     | -      | -     | 13.082 | 10.242 | 1.033 | □-     | □-     | □-    |
| Fe | 7.152  | 3.309  | 1.540 | 6.825  | 3.917  | 1.150 | 7.130  | 3.312  | 1.447 | 6.812  | 3.848  | 0.813 |
| Ce | -      | -      | -     | -      | -      | -     | 0.048  | 4.102  | 0.808 | 0.059  | 4.115  | 1.465 |

**Table S2** The optimized coordinates for the structures in Fig. 1a-d.

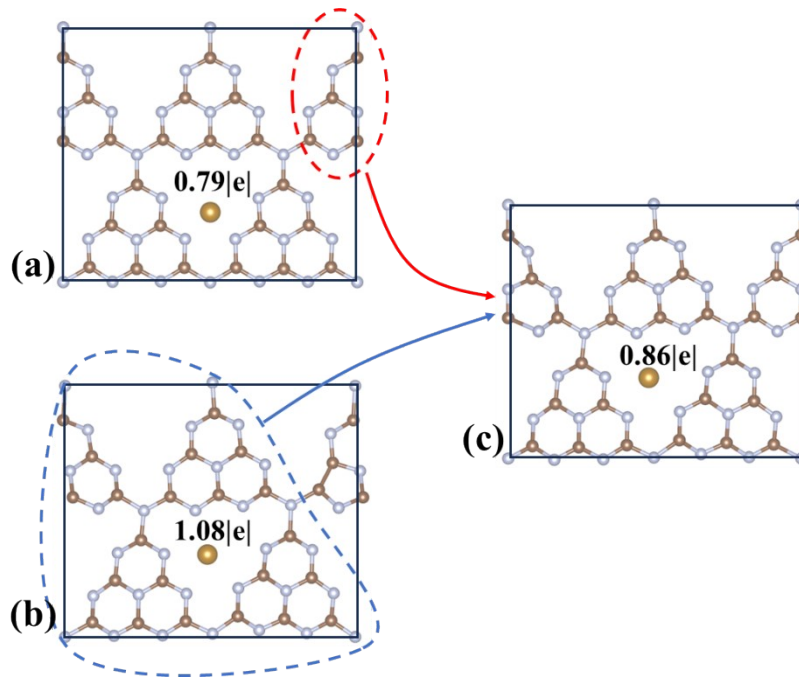

**Fig. S1** (a) Structure of Fe/g-C<sub>3</sub>N<sub>4</sub>, consistent with Figure 1a. (b) Fe/Nv-g-C<sub>3</sub>N<sub>4</sub>, consistent with Figure 1b. (c) The structure of Fe/g-C<sub>3</sub>N<sub>4</sub>, consisting of the red part in (a) and the blue part in (b).

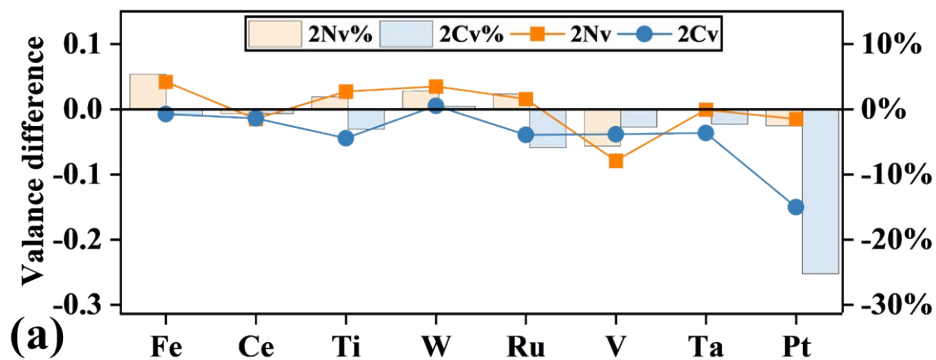

**Fig. S2** (a) The valance difference for element X between double defected and pristine g-C<sub>3</sub>N<sub>4</sub>

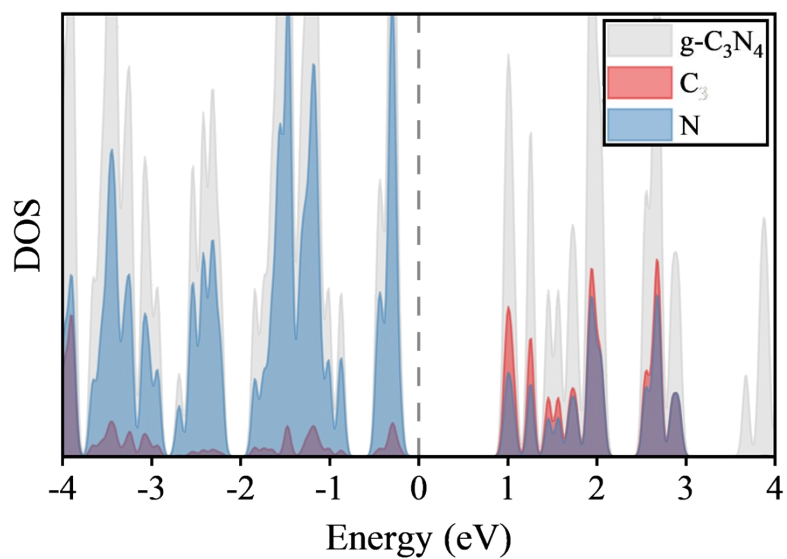

**Fig. S3** The DOS of  $g\text{-C}_3\text{N}_4$

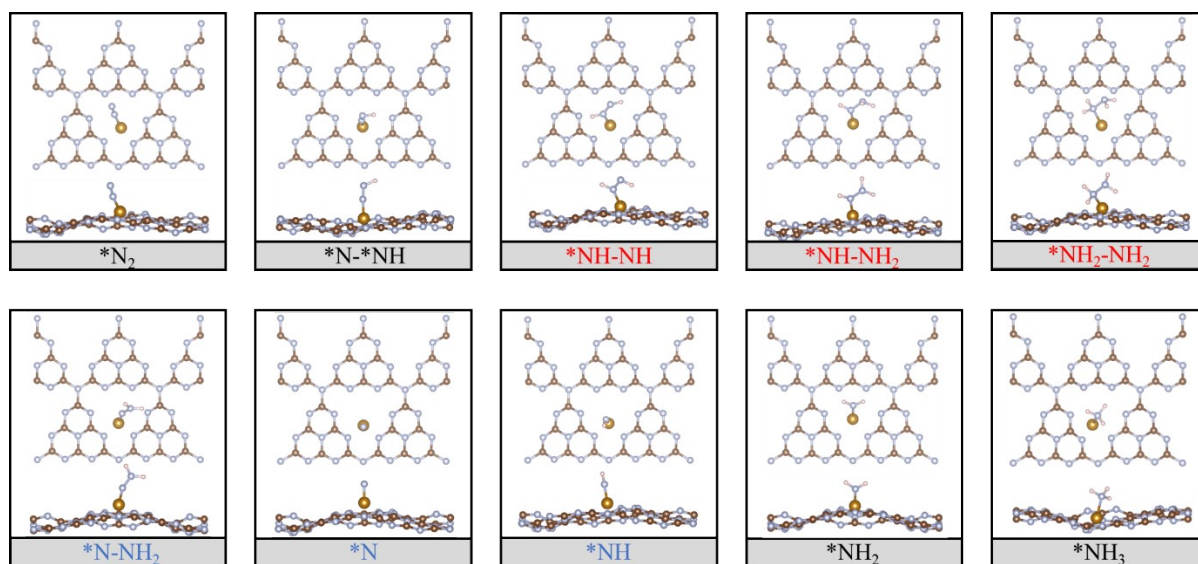

**Fig. S4** Structures of the reaction intermediates for  $\text{N}_2$  reduction on  $\text{Fe}/g\text{-C}_3\text{N}_4$  through the distal (blue) and alternating (red) pathway.

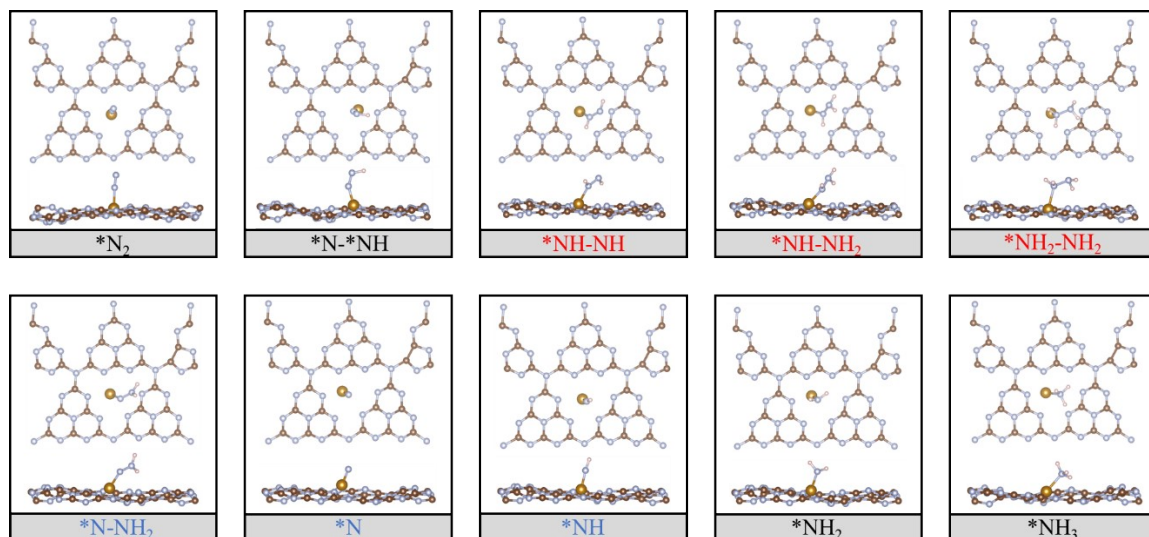

**Fig. S5** Structures of the reaction intermediates for  $N_2$  reduction on Fe/Nv-g- $C_3N_4$  through the distal (blue) and alternating (red) pathway.

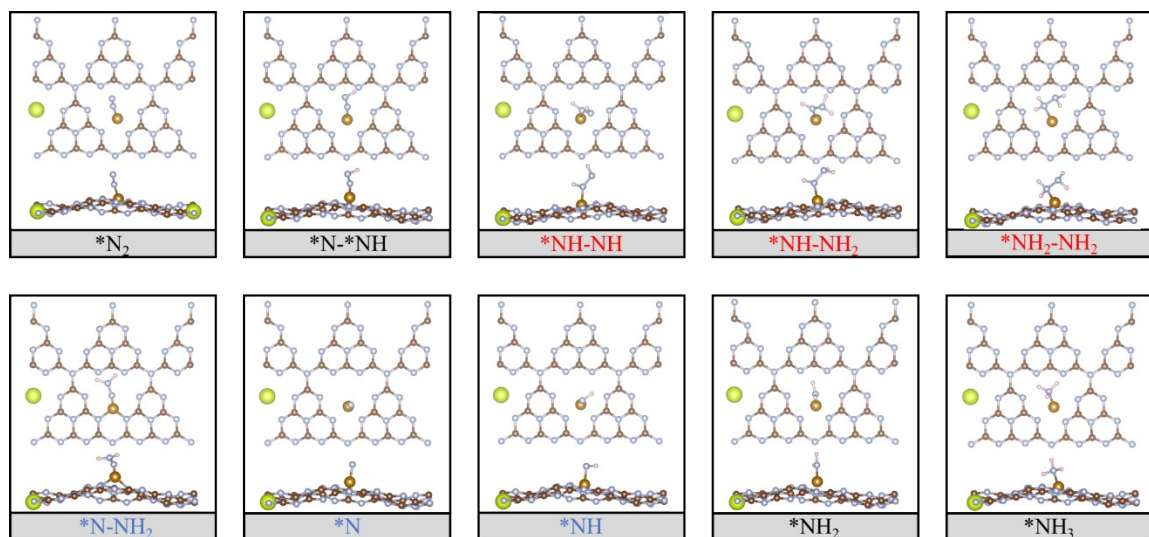

**Fig. S6** Structures of the reaction intermediates for  $N_2$  reduction on Fe-Ce/g- $C_3N_4$  through the distal (blue) and alternating (red) pathway.

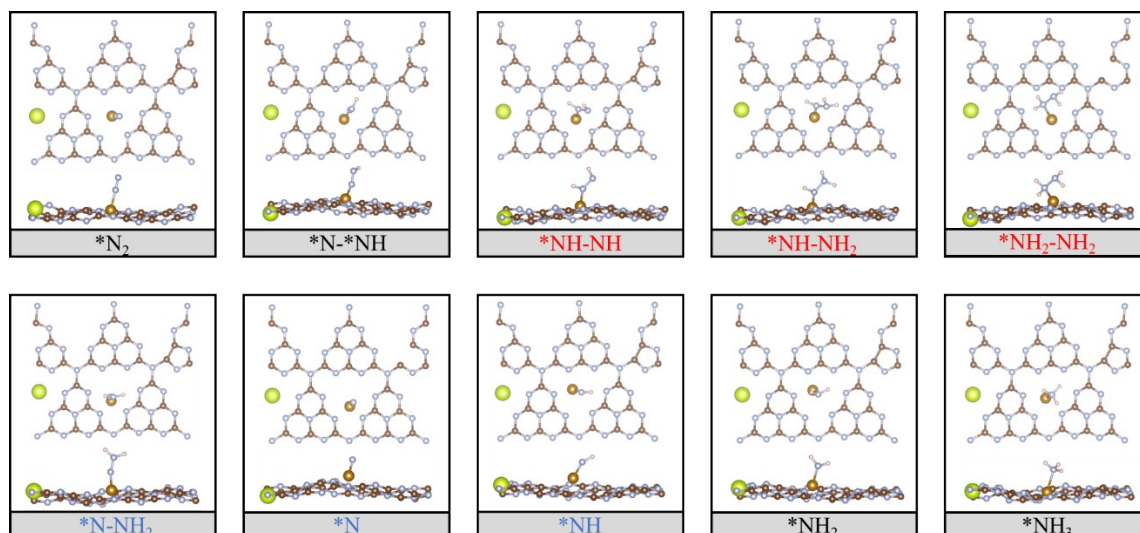

**Fig. S7** Structures of the reaction intermediates for  $N_2$  reduction on Fe-Ce/Nv-g- $C_3N_4$  through the distal (blue) and alternating (red) pathway.

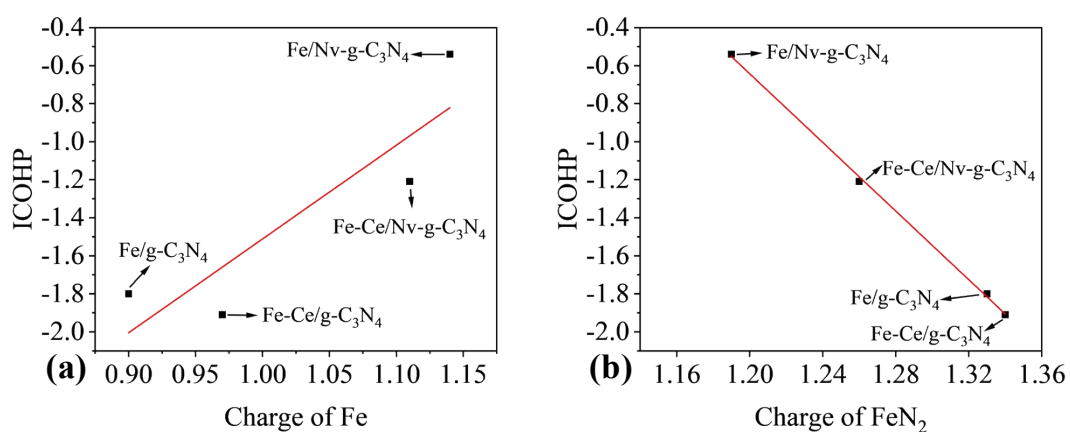

**Fig. S8** Linear relationship between ICOHP and charge of Fe (a) and  $FeN_2$  (b).

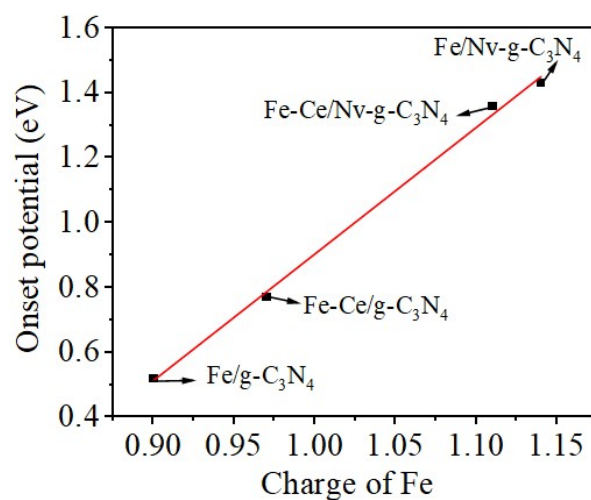

**Fig. S9** Linear relationship between onset potential and charge of Fe.

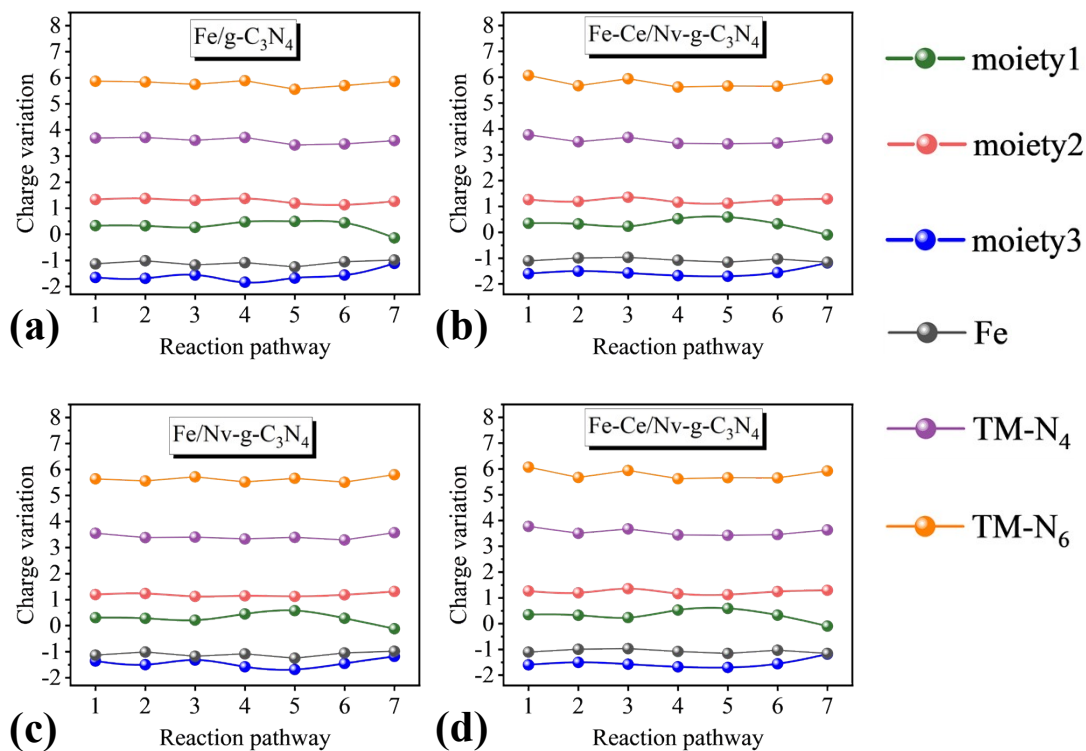

**Fig. S10** Charge variation of the six moieties for (a) Fe/g-C<sub>3</sub>N<sub>4</sub>, (b) Fe-Ce/g-C<sub>3</sub>N<sub>4</sub> (c) Fe/Nv-g-C<sub>3</sub>N<sub>4</sub> and (d) Fe-Ce/Nv-g-C<sub>3</sub>N<sub>4</sub>. Moieties 1, 2, 3, Fe, TM-N<sub>4</sub> and TM-N<sub>6</sub> denote adsorbed N<sub>x</sub>H<sub>y</sub>, TM-N<sub>2</sub> composed of TM and two N atom beside it, and g-C<sub>3</sub>N<sub>4</sub>, isolated Fe atom, TM-N<sub>4</sub> composed of TM and four N atom beside it, TM-N<sub>6</sub> composed of TM and six N atom beside it respectively.

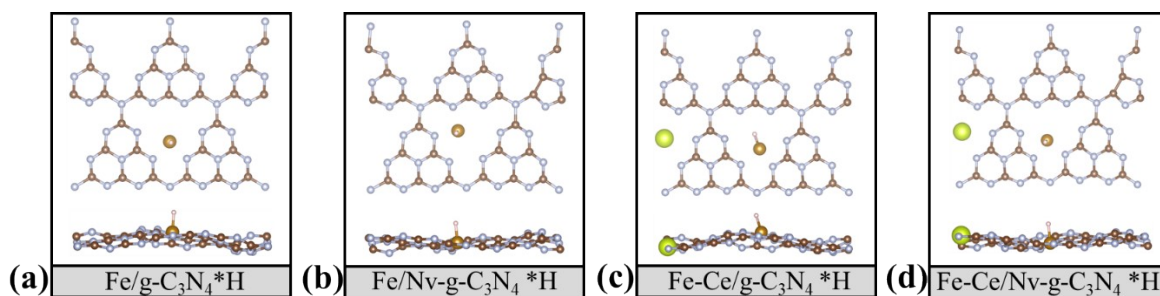

**Fig. S11** H is adsorbed in the top and side views of the structures of (a) Fe/g-C<sub>3</sub>N<sub>4</sub>, (b) Fe/Nv-g-C<sub>3</sub>N<sub>4</sub>, (c) Fe-Ce/g-C<sub>3</sub>N<sub>4</sub> and (d) Fe-Ce/Nv-g-C<sub>3</sub>N<sub>4</sub>.
